# Supplementary material for: Flaxseed oil attenuates PFOS-induced testicular damage by regulating RNA alternative splicing
Source: Royal Society of Chemistry journal article supplement (doi:10.1039/d4fo03486d), 2024-01-01
Supplement: d4fo03486d1.pdf [file d4fo03486d1.pdf]

FigureS1

A

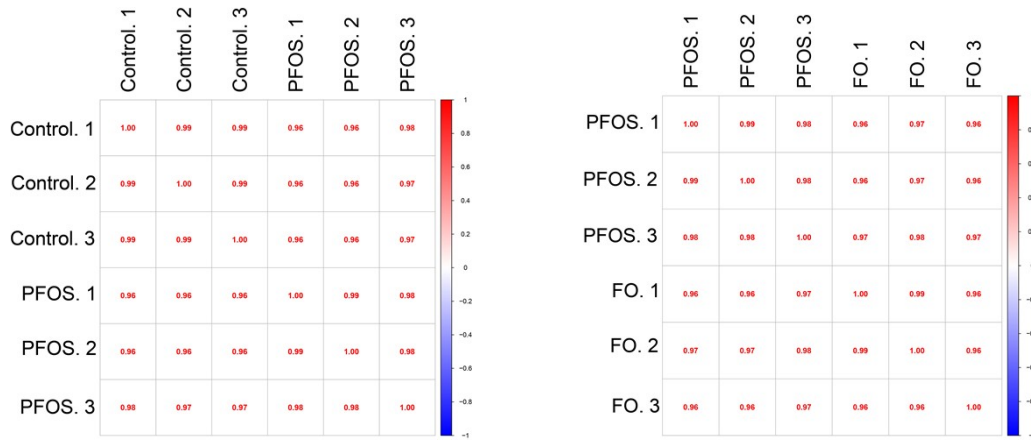

B

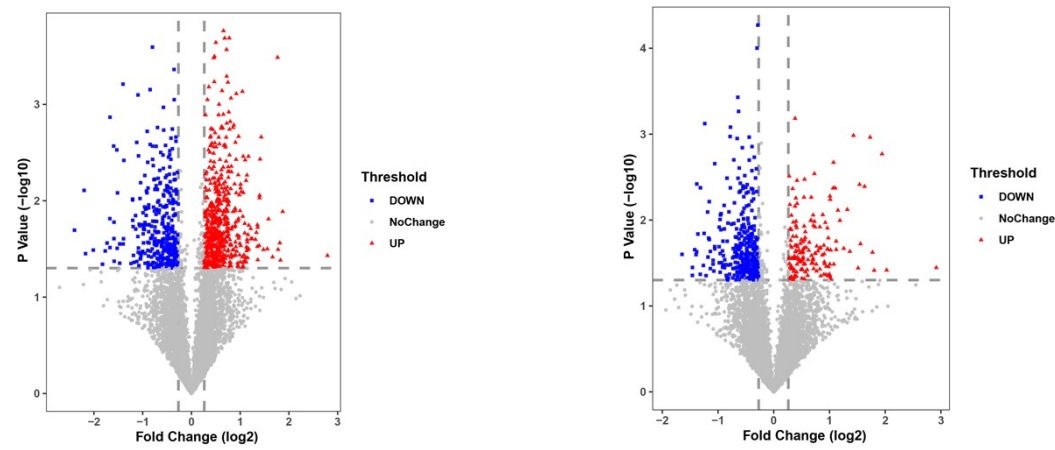

C

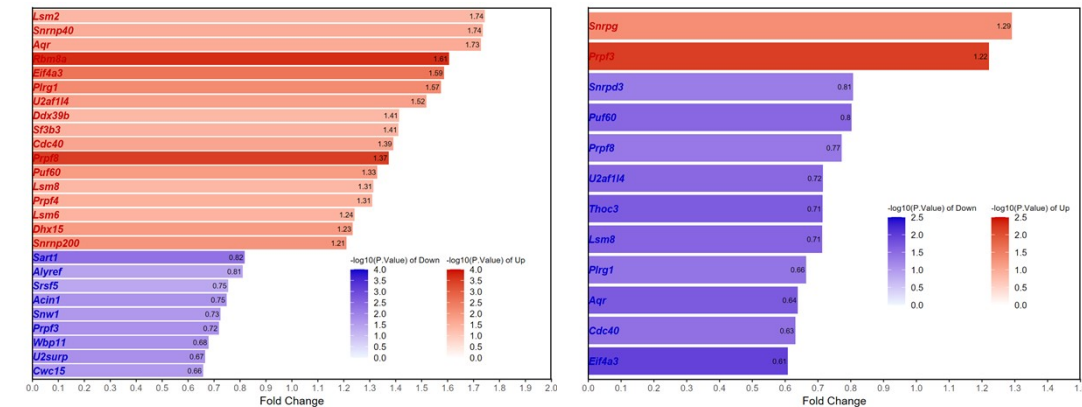

Figure.S1 Distribution of dep. A Pearson's correlation plots between control group and PFOS group, and between PFOS group and FO group. B Volcano plot of differential proteins between control group and PFOS group, PFOS group and FO group. C Changed spliceosome related proteins in PFOS group compared with Control group displayed in heatmap assayed by proteomics. Changed spliceosome related proteins in FO group compared with PFOS group displayed in heatmap assayed by proteomics.

FigureS2

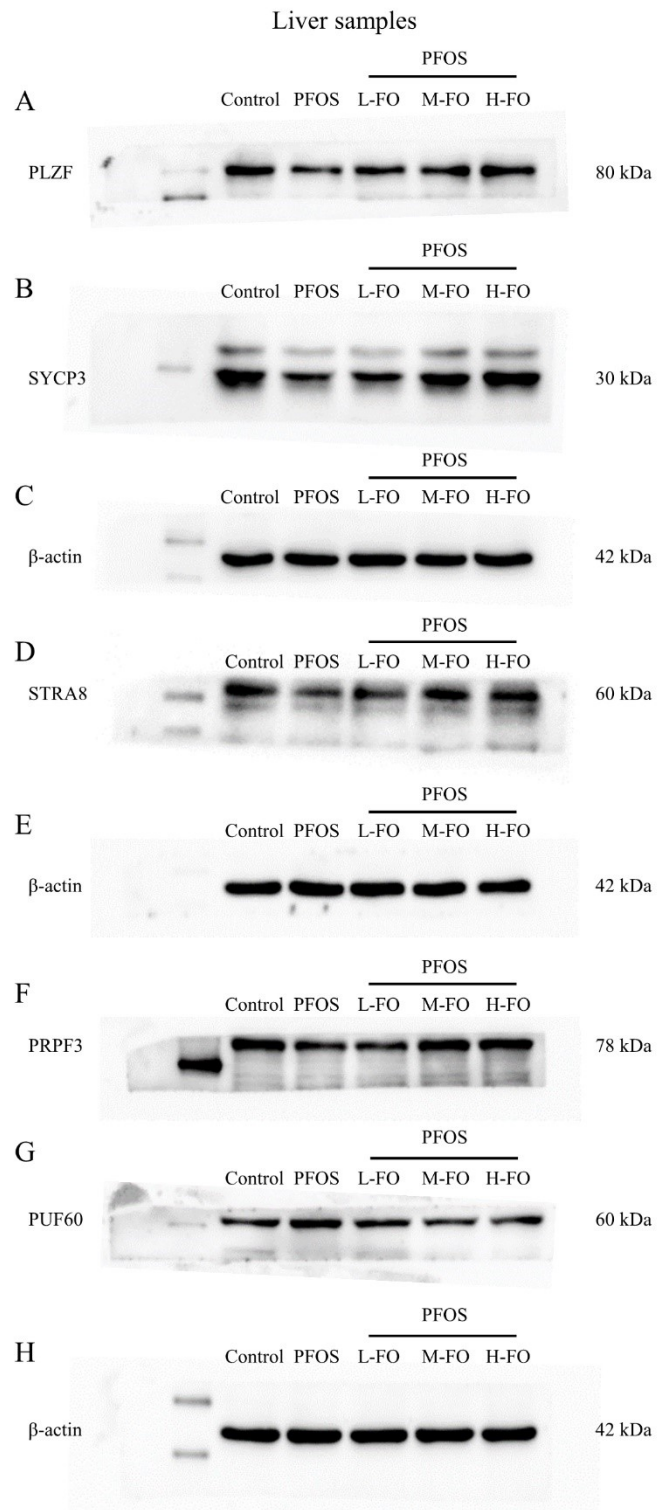

Figure. S2 Original western blot results of PLZF (A), SYCP3(B),  $\beta$ -actin (C), STRA8 (D),  $\beta$ -actin (E), PRPF3 (F), PUF60 (G), and  $\beta$ -actin (H)in Liver for Figure 5C and 8B, respectively.

**Table S1**

Primary antibodies used in western blot

| Antibody       | Supplier                           | Dilution | Calculated |
|----------------|------------------------------------|----------|------------|
| PLZF           | ABclonal Technology (Wuhan ,China) | 1:2000   | 80         |
| SYCP3          | Proteintech (Wuhan ,China)         | 1:1000   | 30         |
| STRA8          | Proteintech (Wuhan ,China)         | 1:1000   | 60         |
| PRPF3          | Proteintech (Wuhan ,China)         | 1:500    | 78         |
| PUF60          | Proteintech (Wuhan ,China)         | 1:5000   | 60         |
| $\beta$ -actin | ABclonal Technology (Wuhan, China) | 1:40000  | 42         |

**Table S2**

Pathways enriched in KEGG analysis for DEPs between control and PFOS groups.

| Description                                 | <i>p</i> -value | <i>q</i> -value | Gene ID                                                                                                                                                                                                                                                            |
|---------------------------------------------|-----------------|-----------------|--------------------------------------------------------------------------------------------------------------------------------------------------------------------------------------------------------------------------------------------------------------------|
| Amyotrophic lateral sclerosis               | 0.000162        | 1.15E-06        | O08583/O55234/P12787/P46412/P47811/P54775/P59235/P62821/P63260/P70195/Q3TXS7/Q3UIU2/Q61337/Q80ZN9/Q8BG32/Q8CBY8/Q8K310/Q8R111/Q8R2U0/Q8R3E3/Q8R480/Q8VDM4/Q99KJ8/Q99LC3/Q99NB8/Q99P88/Q9CQJ8/Q9CQZ5/Q9CR61/Q9CWU9/Q9D1M0/Q9DCJ5/Q9DCS9/Q9QZB7/Q9R1P0/Q9Z1P6/Q9Z2V5 |
| Spliceosome                                 | 8.38E-09        | 1.90E-05        | O08583/O35286/O35326/O35900/P62313/Q3UEB3/Q6NV83/Q6P4T2/Q6PE01/Q6ZWM4/Q8BGJ9/Q8CFQ3/Q91VC3/Q921M3/Q922U1/Q922V4/Q923D5/Q99PV0/Q9CSN1/Q9CWZ3/Q9DAW6/Q9DC48/Q9JHS9/Q9JIX8/Q9Z1N5/Q9Z315                                                                              |
| Carbon metabolism                           | 2.48E-07        | 1.90E-05        | O08528/P05202/P12382/P16858/P21550/P28474/P35486/P47857/Q00612/Q60597/Q64374/Q8CFX1/Q8QZR5/Q8QZS1/Q8VDL4/Q99KE1/Q99MX0/Q99NB1/Q9D7G0/Q9DCD0/Q9QXG4/Q9R0P3                                                                                                          |
| Ribosome                                    | 5.06E-06        | 0.000277        | O09167/P25444/P47962/P47964/P62270/P62702/P62754/P62858/P62908/P63276/P99027/Q3TBW2/Q6ZVW3/Q8BP67/Q99N95/Q99N96/Q9CPR4/Q9CQR2/Q9CR57/Q9D338/Q9D823/Q9DC71                                                                                                          |
| Purine metabolism                           | 1.12E-05        | 0.000433        | O08739/P00493/P03958/P08030/P24547/P46664/P55264/P55772/P56380/Q01768/Q3V1L4/Q5SSUR0/Q61409/Q64737/Q8CIH9/Q91WF3/Q99L27/Q9CWJ9/Q9D0F9/Q9D7G0/Q9WUZ9                                                                                                                |
| Biosynthesis of cofactors                   | 0.000223        | 0.000438        | O35855/P00375/P12265/P36552/P46664/P47738/P60487/P70698/P97494/Q01768/Q5RKZ7/Q64374/Q6ZQM8/Q78JT3/Q7M753/Q8BTZ7/Q91ZJ5/Q9D404/Q9D9M5/Q9DBL7                                                                                                                        |
| Nucleocytoplasmic transport                 | 3.27E-05        | 0.00112         | O08583/O35343/O35691/P59235/P63166/Q8CIC2/Q8R2U0/Q8R480/Q91VC3/Q99M28/Q99P88/Q9CR67/Q9CWU9/Q9CWZ3/Q9D1M0/Q9EPU0/Q9JIX8/Q9Z1N5                                                                                                                                      |
| mRNA surveillance pathway                   | 9.49E-06        | 0.001627        | O08583/O35691/P63087/P63330/Q60996/Q6P1F6/Q76MZ3/Q91VC3/Q925E7/Q99LC2/Q99M28/Q9CWZ3/Q9EPU0/Q9EPU4/Q9JIX8/Q9QXK7/Q9Z1N5                                                                                                                                             |
| Nucleotide metabolism                       | 0.000132        | 0.001627        | O08739/P00493/P03958/P08030/P24547/P46664/P55264/P55772/P70698/Q01768/Q3V1L4/Q99L27/Q9D020/Q9WUZ9                                                                                                                                                                  |
| Aminoacyl-tRNA biosynthesis                 | 2.78E-07        | 0.002704        | Q3U186/Q3U2A8/Q8BIJ6/Q8BIP0/Q8BU30/Q8BYM8/Q8CFI5/Q8VDC0/Q91WQ3/Q9CZD3/Q9D0R2/Q9JL8/Q9WUA2                                                                                                                                                                          |
| Glycolysis / Gluconeogenesis                | 0.000152        | 0.003022        | O08528/P12382/P16125/P16858/P21550/P28474/P35486/P47738/P47857/Q8VDL4/Q99NB1/Q9D0F9/Q9QXG4                                                                                                                                                                         |
| Amino sugar and nucleotide sugar metabolism | 0.000109        | 0.003169        | O08528/O88958/P47856/Q7TMC8/Q8BTZ7/Q91ZJ5/Q9CYR6/Q9D0F9/Q9DB73/Q9DCJ9/Q9QZ08                                                                                                                                                                                       |
| Fatty acid metabolism                       | 0.000203        | 0.003169        | O35448/P32020/P41216/P50544/P52825/P97742/Q8K2C9/Q8VCH0/Q920L1/Q9D404/Q9Z0R9                                                                                                                                                                                       |
| Pentose phosphate pathway                   | 5.94E-05        | 0.003705        | P12382/P47857/Q00612/Q64374/Q8CFX1/Q99MX0/Q9D0F9/Q9D7G0/Q9DCD0                                                                                                                                                                                                     |

**Table S3**

Pathways enriched in KEGG analysis for DEPs between PFOS and FO+PFOS groups.

| Description                        | <i>p</i> -value | <i>q</i> -value | Gene ID                                                                                                                                     |
|------------------------------------|-----------------|-----------------|---------------------------------------------------------------------------------------------------------------------------------------------|
| Salmonella infection               | 0.001004        | 0.027792        | O35343/P07901/P16858/P47811/P61161/P62908/P63321/Q02248/Q60823/Q64331/Q78JE5/Q99KJ8/Q9CVB6/Q9D0M5/Q9D4H1/Q9D898/Q9QZB7/Q9QZB9/Q9R0M6/Q9WTX5 |
| Carbon metabolism                  | 9.92E-09        | 1.37E-06        | P05202/P12382/P16332/P16858/P26443/P28474/Q60597/Q64374/Q8BPC6/Q8CFX1/Q8K2B3/Q91Y97/Q99KE1/Q99MX0/Q99NB1/Q9D2G2/Q9D7G0/Q9EPL9/Q9R0P3        |
| Spliceosome                        | 0.001519        | 0.037007        | P62309/P62320/Q3UEB3/Q6ZWM4/Q8BGJ9/Q8CFQ3/Q8VE80/Q91VC3/Q922U1/Q922V4/Q99PV0/Q9DC48                                                         |
| Ribosome                           | 0.002307        | 0.042759        | O55142/P14131/P47955/P62702/P62908/Q8BU88/Q99N96/Q9CR57/Q9D116/Q9D1P0/Q9D338/Q9D823                                                         |
| Biosynthesis of amino acids        | 0.000316        | 0.01092         | A6H5Y3/O35855/P05202/P12382/P16858/Q61176/Q8BPC6/Q91Y97/Q99MX0/Q9D7G0                                                                       |
| Peroxisome                         | 0.00049         | 0.015058        | O35386/O35488/P11930/P41216/P51660/P58137/Q99LB2/Q9DC50/Q9EPL9/Q9WV68                                                                       |
| Cysteine and methionine metabolism | 7.52E-05        | 0.005208        | A6H5Y3/O35855/P05202/P16125/P50247/P97355/Q71R19/Q9CQ65/Q9QXF8                                                                              |
| Glutathione metabolism             | 0.001604        | 0.037007        | O09131/P24472/P46412/P47791/P97355/Q64471/Q91VS7/Q99L20                                                                                     |
| 2-Oxocarboxylic acid metabolism    | 6.84E-05        | 0.005208        | A2ATU0/O35855/P05202/Q60597/Q6P3A8/Q8BPC6/Q9D2G2                                                                                            |
| Pentose phosphate pathway          | 0.000108        | 0.005978        | P12382/Q64374/Q8CFX1/Q91Y97/Q99MX0/Q9D0F9/Q9D7G0                                                                                            |
| Fatty acid metabolism              | 0.002708        | 0.044958        | O35448/P41216/P50544/P51660/P97742/Q9D404/Q9EPL9                                                                                            |
| Starch and sucrose metabolism      | 0.000195        | 0.008983        | P70699/Q8C194/Q9D0F9/Q9D6Y9/Q9ET01/Q9WUB3                                                                                                   |
| Propanoate metabolism              | 0.000311        | 0.01092         | P16125/P16332/P61922/Q6P3A8/Q99NB1/Q9EPL9                                                                                                   |
| Citrate cycle (TCA cycle)          | 0.002317        | 0.042759        | Q60597/Q8BPC6/Q8K2B3/Q91V92/Q9D2G2                                                                                                          |

**Table S4**

KEGG enrichment analysis was used to analyze the pathways of intersection DEPs

| Description                                 | <i>p</i> -value | <i>q</i> -value | Gene ID                                                                                    |
|---------------------------------------------|-----------------|-----------------|--------------------------------------------------------------------------------------------|
| Salmonella infection                        | 0.001272        | 0.03681         | O35343/P07901/P16858/P47811/P61161/P62908/Q02248/Q64331/Q78JE5/Q99KJ8/Q9CVB6/Q9D898/Q9QZB7 |
| Carbon metabolism                           | 9.57E-07        | 0.000111        | P05202/P12382/P16858/P28474/Q60597/Q64374/Q8CFX1/Q99KE1/Q99MX0/Q99NB1/Q9D7G0/Q9R0P3        |
| Spliceosome                                 | 0.000542        | 0.017915        | Q3UEB3/Q6ZWM4/Q8BGJ9/Q8CFQ3/Q91VC3/Q922U1/Q922V4/Q99PV0/Q9DC48                             |
| Purine metabolism                           | 0.002667        | 0.056156        | P00493/P08030/P55264/Q5SUR0/Q8CIH9/Q9CWJ9/Q9D0F9/Q9D7G0                                    |
| Cysteine and methionine metabolism          | 4.65E-05        | 0.002693        | A6H5Y3/O35855/P05202/P16125/P50247/P97355/Q71R19                                           |
| Biosynthesis of amino acids                 | 0.000513        | 0.017915        | A6H5Y3/O35855/P05202/P12382/P16858/Q99MX0/Q9D7G0                                           |
| Pentose phosphate pathway                   | 2.49E-05        | 0.001923        | P12382/Q64374/Q8CFX1/Q99MX0/Q9D0F9/Q9D7G0                                                  |
| Glycolysis / Gluconeogenesis                | 0.001915        | 0.049286        | P12382/P16125/P16858/P28474/Q99NB1/Q9D0F9                                                  |
| Starch and sucrose metabolism               | 8.66E-05        | 0.004013        | Q8CI94/Q9D0F9/Q9D6Y9/Q9ET01/Q9WUB3                                                         |
| Fatty acid metabolism                       | 0.003203        | 0.06181         | O35448/P41216/P50544/P97742/Q9D404                                                         |
| 2-Oxocarboxylic acid metabolism             | 0.002175        | 0.050372        | A2ATU0/O35855/P05202/Q60597                                                                |
| Alanine, aspartate and glutamate metabolism | 0.004433        | 0.078972        | P05202/P47856/P61922/Q8CIH9                                                                |
| Aminoacyl-tRNA biosynthesis                 | 0.006595        | 0.109097        | Q8CFI5/Q8VDC0/Q9CZD3/Q9JL8                                                                 |
| Fatty acid degradation                      | 0.012173        | 0.172399        | P28474/P41216/P50544/P97742                                                                |

**Table S5**

Major terms enriched in GO analysis of DEPS in the control and PFOS groups

| Description                                               | Ontology | GO IDs     | <i>p</i> -value | <i>p</i> -adjust |
|-----------------------------------------------------------|----------|------------|-----------------|------------------|
| transcription, DNA-templated                              | BP       | GO:0006351 | 0.000485        | 0.007942         |
| positive regulation of transcription by RNA polymerase II | BP       | GO:0045944 | 6.55E-05        | 0.002084         |
| protein transport                                         | BP       | GO:0015031 | 2.09E-11        | 3.74E-09         |
| translation                                               | BP       | GO:0006412 | 2.56E-09        | 3.33E-07         |
| negative regulation of transcription by RNA polymerase II | BP       | GO:0000122 | 0.004399        | 0.034345         |
| negative regulation of apoptotic process                  | BP       | GO:0043066 | 0.000416        | 0.006935         |
| mRNA processing                                           | BP       | GO:0006397 | 2.19E-09        | 2.93E-07         |
| proteolysis                                               | BP       | GO:0006508 | 9.00E-12        | 1.68E-09         |
| intracellular protein transport                           | BP       | GO:0006886 | 0.000194        | 0.00454          |
| apoptotic process                                         | BP       | GO:0006915 | 0.001844        | 0.019117         |
| spermatogenesis                                           | BP       | GO:0007283 | 6.52E-05        | 0.002084         |
| mRNA splicing, via spliceosome                            | BP       | GO:0000398 | 1.60E-10        | 2.65E-08         |
| multicellular organism development                        | BP       | GO:0007275 | 0.001236        | 0.014823         |
| RNA splicing                                              | BP       | GO:0008380 | 5.35E-10        | 7.92E-08         |
| cell migration                                            | BP       | GO:0016477 | 4.20E-07        | 3.40E-05         |
| cytoplasm                                                 | CC       | GO:0005737 | 1.32E-98        | 2.84E-95         |
| nucleus                                                   | CC       | GO:0005634 | 2.65E-37        | 1.63E-34         |
| extracellular exosome                                     | CC       | GO:0070062 | 5.23E-109       | 2.24E-105        |
| cytosol                                                   | CC       | GO:0005829 | 2.66E-71        | 2.85E-68         |
| membrane                                                  | CC       | GO:0016020 | 7.47E-47        | 5.34E-44         |
| mitochondrion                                             | CC       | GO:0005739 | 4.50E-62        | 3.87E-59         |
| nucleoplasm                                               | CC       | GO:0005654 | 2.48E-33        | 1.33E-30         |
| plasma membrane                                           | CC       | GO:0005886 | 0.000884        | 0.011429         |
| extracellular space                                       | CC       | GO:0005615 | 3.27E-05        | 0.001298         |
| nucleolus                                                 | CC       | GO:0005730 | 2.28E-14        | 7.01E-12         |
| Golgi apparatus                                           | CC       | GO:0005794 | 1.13E-12        | 2.71E-10         |
| endoplasmic reticulum                                     | CC       | GO:0005783 | 8.39E-12        | 1.64E-09         |
| endoplasmic reticulum membrane                            | CC       | GO:0005789 | 3.95E-13        | 9.97E-11         |
| perinuclear region of cytoplasm                           | CC       | GO:0048471 | 5.78E-12        | 1.18E-09         |
| intracellular membrane-bounded organelle                  | CC       | GO:0043231 | 1.38E-15        | 4.94E-13         |
| ATP binding                                               | MF       | GO:0005524 | 0.000152061     | 0.003933443      |
| metal ion binding                                         | MF       | GO:0046872 | 0.000129704     | 0.003525002      |
| protein homodimerization activity                         | MF       | GO:0042803 | 3.77E-12        | 8.10E-10         |
| cadherin binding involved in cell-cell adhesion           | MF       | GO:0098641 | 5.10E-21        | 2.43E-18         |
| identical protein binding                                 | MF       | GO:0042802 | 1.60E-10        | 2.65E-08         |
| structural constituent of ribosome                        | MF       | GO:0003735 | 1.20E-09        | 1.72E-07         |

---

|                                     |    |            |             |             |
|-------------------------------------|----|------------|-------------|-------------|
| RNA binding                         | MF | GO:0003723 | 0.00032339  | 0.005884055 |
| chromatin binding                   | MF | GO:0003682 | 3.62E-05    | 0.001339888 |
| protein kinase binding              | MF | GO:0019901 | 4.81E-05    | 0.001678154 |
| protein heterodimerization activity | MF | GO:0046982 | 5.32E-05    | 0.001812969 |
| mRNA binding                        | MF | GO:0003729 | 6.32E-08    | 6.31E-06    |
| magnesium ion binding               | MF | GO:0000287 | 0.003463469 | 0.027955146 |
| signaling receptor binding          | MF | GO:0005102 | 0.000138951 | 0.003660459 |
| transcription factor binding        | MF | GO:0008134 | 0.000175444 | 0.004422787 |
| enzyme binding                      | MF | GO:0019899 | 8.83E-05    | 0.002634403 |

---



**Table S6**

Major terms enriched in GO analysis of DEPS in the PFOS and FO groups.

| Description                                               | Ontology | GO IDs     | <i>p</i> -value | <i>p</i> -adjust |
|-----------------------------------------------------------|----------|------------|-----------------|------------------|
| transcription, DNA-templated                              | BP       | GO:0006351 | 0.008742386     | 0.046270563      |
| positive regulation of transcription by RNA polymerase II | BP       | GO:0045944 | 0.000611185     | 0.011182554      |
| proteolysis                                               | BP       | GO:0006508 | 3.53E-11        | 7.93E-09         |
| translation                                               | BP       | GO:0006412 | 4.54E-05        | 0.002306786      |
| multicellular organism development                        | BP       | GO:0007275 | 0.000185962     | 0.005565815      |
| protein transport                                         | BP       | GO:0015031 | 3.77E-05        | 0.002043437      |
| response to drug                                          | BP       | GO:0042493 | 1.00E-05        | 0.000753019      |
| cell division                                             | BP       | GO:0051301 | 2.10E-05        | 0.001310331      |
| intracellular protein transport                           | BP       | GO:0006886 | 0.002038954     | 0.024753005      |
| regulation of cell proliferation                          | BP       | GO:0042127 | 1.75E-05        | 0.00122095       |
| spermatogenesis                                           | BP       | GO:0007283 | 0.005267031     | 0.043619335      |
| mRNA splicing, via spliceosome                            | BP       | GO:0000398 | 0.000115791     | 0.004140857      |
| mRNA processing                                           | BP       | GO:0006397 | 0.002702461     | 0.028467975      |
| cell cycle                                                | BP       | GO:0007049 | 0.003493135     | 0.033668252      |
| aging                                                     | BP       | GO:0007568 | 0.000688679     | 0.012107387      |
| cytoplasm                                                 | CC       | GO:0005737 | 1.34E-44        | 1.41E-41         |
| extracellular exosome                                     | CC       | GO:0070062 | 3.60E-67        | 1.13E-63         |
| nucleus                                                   | CC       | GO:0005634 | 2.74E-16        | 1.08E-13         |
| mitochondrion                                             | CC       | GO:0005739 | 7.90E-55        | 1.24E-51         |
| membrane                                                  | CC       | GO:0016020 | 6.17E-24        | 3.24E-21         |
| cytosol                                                   | CC       | GO:0005829 | 1.99E-33        | 1.57E-30         |
| nucleoplasm                                               | CC       | GO:0005654 | 1.08E-18        | 4.87E-16         |
| plasma membrane                                           | CC       | GO:0005886 | 0.002002        | 0.024521         |
| perinuclear region of cytoplasm                           | CC       | GO:0048471 | 9.72E-11        | 2.04E-08         |
| nucleolus                                                 | CC       | GO:0005730 | 1.22E-06        | 0.000133         |
| endoplasmic reticulum                                     | CC       | GO:0005783 | 3.27E-06        | 0.000327         |
| Golgi apparatus                                           | CC       | GO:0005794 | 2.03E-05        | 0.00131          |
| endoplasmic reticulum membrane                            | CC       | GO:0005789 | 2.98E-07        | 4.26E-05         |
| focal adhesion                                            | CC       | GO:0005925 | 2.87E-10        | 5.64E-08         |
| intracellular membrane-bounded organelle                  | CC       | GO:0043231 | 6.00E-09        | 1.11E-06         |
| metal ion binding                                         | MF       | GO:0046872 | 0.001036        | 0.016215         |
| identical protein binding                                 | MF       | GO:0042802 | 6.18E-12        | 1.50E-09         |
| protein homodimerization activity                         | MF       | GO:0042803 | 1.20E-08        | 2.09E-06         |
| cadherin binding involved in cell-cell adhesion           | MF       | GO:0098641 | 1.21E-12        | 3.45E-10         |
| chromatin binding                                         | MF       | GO:0003682 | 0.00053         | 0.009866         |
| structural constituent of ribosome                        | MF       | GO:0003735 | 0.000221        | 0.005566         |
| enzyme binding                                            | MF       | GO:0019899 | 5.22E-07        | 6.57E-05         |

---

|                              |    |            |          |          |
|------------------------------|----|------------|----------|----------|
| GTPase activity              | MF | GO:0003924 | 0.001457 | 0.020022 |
| signaling receptor binding   | MF | GO:0005102 | 0.000112 | 0.004102 |
| transcription factor binding | MF | GO:0008134 | 0.000135 | 0.004603 |
| protein kinase binding       | MF | GO:0019901 | 0.004137 | 0.037843 |
| microtubule binding          | MF | GO:0008017 | 2.42E-05 | 0.001464 |
| protein C-terminus binding   | MF | GO:0008022 | 5.57E-05 | 0.002697 |
| actin filament binding       | MF | GO:0051015 | 2.75E-06 | 0.000288 |
| mRNA binding                 | MF | GO:0003729 | 0.001509 | 0.020542 |

---

**Table S7**  
Major terms enriched in GO analysis of intersection DEPs

| Description                                               | Ontology | GO IDs     | <i>p</i> -value | <i>p</i> -adjust |
|-----------------------------------------------------------|----------|------------|-----------------|------------------|
| transcription, DNA-templated                              | BP       | GO:0006351 | 0.009988        | 0.0444           |
| positive regulation of transcription by RNA polymerase II | BP       | GO:0045944 | 0.000566        | 0.012217         |
| proteolysis                                               | BP       | GO:0006508 | 3.32E-08        | 4.68E-06         |
| regulation of cell proliferation                          | BP       | GO:0042127 | 3.11E-07        | 3.65E-05         |
| spermatogenesis                                           | BP       | GO:0007283 | 0.000186        | 0.005544         |
| intracellular protein transport                           | BP       | GO:0006886 | 0.002532        | 0.029433         |
| multicellular organism development                        | BP       | GO:0007275 | 0.002445        | 0.029229         |
| cell differentiation                                      | BP       | GO:0030154 | 0.001925        | 0.025328         |
| translation                                               | BP       | GO:0006412 | 0.008536        | 0.039616         |
| protein transport                                         | BP       | GO:0015031 | 0.004063        | 0.029517         |
| response to drug                                          | BP       | GO:0042493 | 0.002098        | 0.026588         |
| mRNA splicing, via spliceosome                            | BP       | GO:0000398 | 0.00012         | 0.003929         |
| mRNA processing                                           | BP       | GO:0006397 | 0.001523        | 0.023192         |
| positive regulation of gene expression                    | BP       | GO:0010628 | 0.012266        | 0.046049         |
| cell division                                             | BP       | GO:0051301 | 0.00635         | 0.039058         |
| cytoplasm                                                 | CC       | GO:0005737 | 8.51E-37        | 9.00E-34         |
| extracellular exosome                                     | CC       | GO:0070062 | 2.65E-52        | 5.61E-49         |
| nucleus                                                   | CC       | GO:0005634 | 1.02E-13        | 3.09E-11         |
| cytosol                                                   | CC       | GO:0005829 | 7.89E-28        | 5.56E-25         |
| mitochondrion                                             | CC       | GO:0005739 | 3.98E-27        | 2.11E-24         |
| membrane                                                  | CC       | GO:0016020 | 4.03E-16        | 1.42E-13         |
| plasma membrane                                           | CC       | GO:0005886 | 0.002047        | 0.026098         |
| nucleoplasm                                               | CC       | GO:0005654 | 1.89E-10        | 4.78E-08         |
| perinuclear region of cytoplasm                           | CC       | GO:0048471 | 2.42E-08        | 3.65E-06         |
| extracellular space                                       | CC       | GO:0005615 | 0.014534        | 0.049844         |
| nucleolus                                                 | CC       | GO:0005730 | 0.000133        | 0.004141         |
| Golgi apparatus                                           | CC       | GO:0005794 | 0.000195        | 0.005577         |
| focal adhesion                                            | CC       | GO:0005925 | 5.93E-08        | 7.39E-06         |
| mitochondrial matrix                                      | CC       | GO:0005759 | 2.03E-10        | 4.78E-08         |
| cell-cell adherens junction                               | CC       | GO:0005913 | 5.76E-08        | 7.39E-06         |
| metal ion binding                                         | MF       | GO:0046872 | 0.004867        | 0.031984         |
| identical protein binding                                 | MF       | GO:0042802 | 4.16E-10        | 8.80E-08         |
| protein homodimerization activity                         | MF       | GO:0042803 | 1.03E-08        | 1.81E-06         |
| cadherin binding involved in cell-cell adhesion           | MF       | GO:0098641 | 8.60E-09        | 1.66E-06         |
| chromatin binding                                         | MF       | GO:0003682 | 0.004589        | 0.030462         |
| transcription factor binding                              | MF       | GO:0008134 | 0.000119        | 0.003929         |
| enzyme binding                                            | MF       | GO:0019899 | 7.70E-05        | 0.003013         |

---

|                               |    |            |          |          |
|-------------------------------|----|------------|----------|----------|
| pyridoxal phosphate binding   | MF | GO:0030170 | 4.91E-06 | 0.000452 |
| magnesium ion binding         | MF | GO:0000287 | 0.014311 | 0.049159 |
| metalloendopeptidase activity | MF | GO:0004222 | 0.007018 | 0.039616 |
| microtubule binding           | MF | GO:0008017 | 3.51E-05 | 0.001866 |
| mRNA binding                  | MF | GO:0003729 | 0.001851 | 0.024951 |
| actin filament binding        | MF | GO:0051015 | 9.41E-05 | 0.003433 |
| actin binding                 | MF | GO:0003779 | 0.007586 | 0.039616 |
| aminopeptidase activity       | MF | GO:0004177 | 7.83E-05 | 0.003013 |

---
